# Supplementary material for: Identification of diverse viruses in upper respiratory samples in dromedary camels from United Arab Emirates
Source: PubMed Central journal article supplement (PMC5597213; doi:10.1371/journal.pone.0184718), 2017-09-13
Supplement: pone.0184718.s003.pdf [file pone.0184718.s003.pdf]

**S2 Table. PCR primers used for viruses detected in this study**

| <b>Virus</b>                 | <b>Virus group</b>  | <b>Primer name and sequence (5'-3')</b>                                                                                      | <b>Reference</b> |
|------------------------------|---------------------|------------------------------------------------------------------------------------------------------------------------------|------------------|
| Camel alpha-CoV Abu Dhabi    | Coronaviruses       | <b>Forward:</b> F2: ATGGGITGGGAYTATCCWAARTGTG; <b>Reverse:</b> R2: CTAGTICCACCIGGYTTWANRTA                                   | [34]             |
| Camel CoV HKU23 Abu Dhabi    | Coronaviruses       | <b>Forward:</b> F2: ATGGGITGGGAYTATCCWAARTGTG; <b>Reverse:</b> R2: CTAGTICCACCIGGYTTWANRTA                                   | [34]             |
| Camel bocavirus 3 Abu Dhabi  | Bocaparvoviruses    | <b>Forward:</b> Boca-F1730: TGTTCCGGCTTATGGITGYGTNAAAYCA; <b>Reverse:</b> Boca-R2055: CCAAATGTGTGTGGIAGTTGYTTCATRAARTT       | n/a              |
| Camel CCHFV Abu Dhabi        | Orthonairoviruses   | <b>Forward:</b> F7145: GCTTCTATGCAGTTTTAGCACCAARGCNCA; <b>Reverse:</b> R7447: TGTATCGGGCCCCATTIGTRTTRTCNCC                   | n/a              |
| Camel PIV3 Abu Dhabi         | Paramyxoviruses     | <b>Forward:</b> RES-MOR-HEN-F1: TCITTCTTTAGAACITTYGGNCAYCC; <b>Reverse:</b> RES-MOR-HEN-R: CTCATTTTGTGTAIGTCATYTTNGCRAA      | [35]             |
| Camel PIV4 Abu Dhabi         | Paramyxoviruses     | <b>Forward:</b> AVU-RUB-F2: ACACTCTATGTIGGIGAICCNNTTYAAYCC; <b>Reverse:</b> AVU-RUB-R: GCAATTGCTTGATTITCICCYTGNAC            | [35]             |
| Camel polyomavirus Abu Dhabi | Polyomaviruses      | <b>1st Rd: Forward:</b> PYV-05-01 F0: GGAAATCTACTGATGTGGGARGCNRT; <b>Reverse:</b> PYV-05-06 R2: CAAAGIGGCCCAACNCCATNYTCAT    | [36]             |
|                              |                     | <b>2nd Rd: Forward:</b> PYV-05-01 F0: GGAAATCTACTGATGTGGGARGCNRT; <b>Reverse:</b> PYV-05-05 R1-1: GTTCCAAAATATCTNGTRTTYTCATT | [36]             |
| Camel AAV                    | Dependoparvoviruses | <b>Forward:</b> dependo-F745: CCTCGGGI RATTGGCA YTYGA; <b>Reverse:</b> dependo-R1000: GTTGTGATGAGNCKYTGCCARTC                | n/a              |
| Dromedary astrovirus         | Astroviruses        | <b>Forward:</b> Ast-F1: TGGACCCGCTATGATGGIACNATHCC; <b>Reverse:</b> Ast-R1: TTCCAGGCTTIACCCACATRCCRAA                        | n/a              |
